# Supplementary material for: hnRNPA2B1-Mediated Extracellular Vesicles Sorting of miR-122-5p Potentially Promotes Lung Cancer Progression
Source: MDPI journal article supplement (doi:10.3390/ijms222312866), 2021-11-28
Supplement: s1 [file s1]

## Supplementary figures and legends

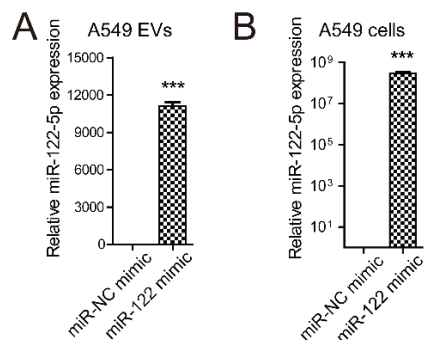

**Figure S1.** Overexpression of miR-122-5p increases its secretion into EVs. Expression of miR-122-5p in EVs (A) and cell lysate (B) from A549 cells transfected with miR-122-5p mimic or NC mimic. Three independent experiments were performed. Ns: no significance, \*:  $p < 0.05$ , \*\*:  $p < 0.01$ , \*\*\*:  $p < 0.001$ , compared to the control with the Student's *t* test.

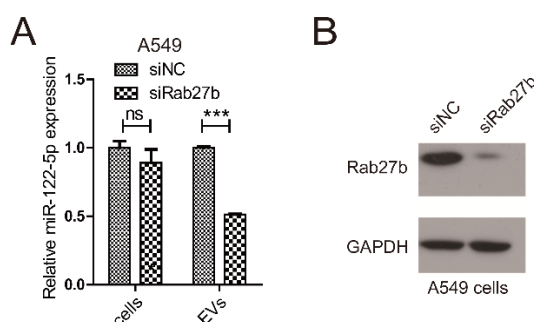

**Figure S2.** Downregulation of Rab27b inhibits secretion of miR-122-5p into EVs. (A) Expression of miR-122-5p in EVs and cell lysate of A549 transfected with Rab27b siRNA or NC siRNA. (B) Western blot results show the knockdown efficiency of Rab27b siRNA. Three independent experiments were performed. Ns: no significance, \*:  $p < 0.05$ , \*\*:  $p < 0.01$ , \*\*\*:  $p < 0.001$ , compared to the control with the Student's *t* test.

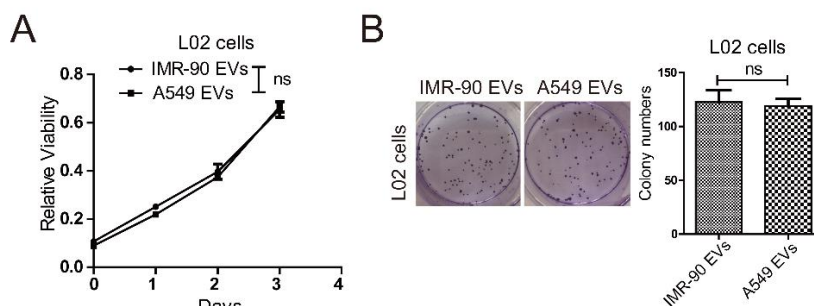

**Figure S3.** A549 cells derived EVs have no significant influence on the proliferation of L02 cells. (A) MTT assay shows the proliferation ability of L02 cells incubated with EVs from IMR-90 or A549 cells culture medium. (B) Colony formation assay of L02 cells treated with IMR-90 EVs or A549 EVs. And the statistical results of colony numbers were shown as the right panel. Three independent experiments were performed. Ns: no significance, \*:  $p < 0.05$ , \*\*:  $p < 0.01$ , \*\*\*:  $p < 0.001$ , compared to the control with the Student's *t* test.
